## RESEARCH ARTICLE

# Bioinformatics-driven discovery of novel EGFR kinase inhibitors as anti-cancer therapeutics: *In silico* screening and *in vitro* evaluation

Awwad A. Radwan<sup>1,2\*</sup>, Fars Alanazi<sup>1</sup>, Abdullah Al-Dhfyhan<sup>2</sup>

**1** Department of Pharmaceutics, Kayyali Chair for Pharmaceutical Industries, College of Pharmacy, King Saud University, Riyadh, Saudi Arabia, **2** Department King Faisal Specialized Hospital and Research Center, Cell Therapy & Immunobiology, Riyadh, Saudi Arabia

\* [aradwan@ksu.edu.sa](mailto:aradwan@ksu.edu.sa)

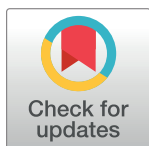

## OPEN ACCESS

**Citation:** Radwan AA, Alanazi F, Al-Dhfyhan A (2024) Bioinformatics-driven discovery of novel EGFR kinase inhibitors as anti-cancer therapeutics: *In silico* screening and *in vitro* evaluation. PLoS ONE 19(4): e0298326. <https://doi.org/10.1371/journal.pone.0298326>

**Editor:** Wagdy Mohamed Eldehna, Kafrelsheikh University Faculty of Pharmacy, EGYPT

**Received:** November 20, 2023

**Accepted:** January 18, 2024

**Published:** April 16, 2024

**Copyright:** © 2024 Radwan et al. This is an open access article distributed under the terms of the [Creative Commons Attribution License](https://creativecommons.org/licenses/by/4.0/), which permits unrestricted use, distribution, and reproduction in any medium, provided the original author and source are credited.

**Data Availability Statement:** All relevant data are within the paper and its [Supporting Information](#) files.

**Funding:** The Deputyship for Research & Innovation, Ministry of Education in Saudi Arabia for funding this re-search IFKSURC-1-0803.

**Competing interests:** The authors have declared that no competing interests exist.

## Abstract

Epidermal growth factor receptor EGFR inhibitors are widely used as first line therapy for the treatment of non-small-cell lung cancer (NSCLC) in patients harboring EGFR mutation. However, the acquisition of a second-site mutation (T790 M) limited the efficacy and developed resistance. Therefore, discovery and development of specific drug target for this mutation is of urgent needs. In our study we used the ChemDiv diversity database for receptor-based virtual screening to secure EGFR-TK inhibitors chemotherapeutics. We identified four compounds that bind to the ATP-binding region of the EGFR-TK using AutoDock 4.0 and AutoDock Vina1.1.2 and post-docking investigations. The ligand showed hydrophobic interactions to the hydrophobic region of the binding site and engaged in hydrogen bonding with Met793. The ligands also explored  $\pi$ -cation interactions between the  $\pi$ -system of the ligand-phenyl ring and the positive amino group of Lys745. Molecular mechanics Poisson-Boltzmann surface area MM/PBSA per-residue energy decomposition analyses revealed that Val726, Leu792, Met793, Gly796, Cys797, Leu798, and Thr844 contributed the most to the binding energy. Biological evaluation of the retrieved hit compounds showed suppressing activity against EGFR auto phosphorylation and selective apoptosis-induced effects toward lung cancer cells harboring the EGFR L858R/T790M double mutation. Our work anticipated into novel and specific EGFR-TKIs and identified new compounds with therapeutic potential against lung cancer.

## Introduction

The family of epidermal growth factor receptor tyrosine kinase (ErbBs) is an essential component of the cellular signaling pathways that control vital processes such as cell survival, differentiation, proliferation, and apoptosis [1]. The erythroblastic leukaemia viral oncogene, for which the receptors are identical, is the source of the ErbB family's name. The four structurally conserved members of this family are epidermal growth factor receptors EGFR/ErbB1, ErbB2, ErbB3, and ErbB4. Their common domain structure includes an intracellular area with a

juxtamembrane domain (53 aa), tyrosine kinase (TK) domain (260 aa), C-terminal tyrosine-rich region (232 aa). The extracellular domain that binds ligands includes a hydrophobic trans-membrane segment and an extracellular segment [2, 3]. The growth factors (transforming growth factor- $\alpha$  (TGF- $\alpha$ ) and epidermal growth factor (EGF)) bind to the extracellular portion of the receptor. This results in activation and phosphorylation of the TK domain at its C-terminal residues, causing the receptor to homo- and/or heterodimerize and initiate downstream signaling cascades [4]. EGFR is overexpressed in approximately 60% of individuals with non-small cell lung cancer (NSCLC), the most prevalent type of lung cancer and the primary cause of cancer-related deaths globally [5]. Clinical studies had highlighted EGFR dysregulation as a therapeutic target in NSCLC [6]. Four different types of anti-EGFR chemotherapies are currently available: monoclonal antibodies (mAbs), which target the extracellular domain of EGFR [7]; antisense oligonucleotides, which stop the synthesis of EGFR; antibody-based immunoconjugates [8, 9]; and small molecular-weight compounds that block tyrosine kinase activity. First-generation EGFR-TK inhibitors (EGFR-TKIs) includes gefitinib (Iressa<sup>TM</sup>, AstraZeneca), erlotinib (Tarceva<sup>TM</sup>, OSI-Pharma/Genentech/Roche), and lapatinib (Tykerb<sup>TM</sup>, GlaxoSmithKline) are small molecules that compete with ATP in the TK binding domain [10] (Fig 1). Second- and third-generation EGFR-TKIs include afatinib (Gilotrif<sup>TM</sup>; Boehringer Ingelheim) and avitinib (clinical trials), respectively. Although only a few NSCLC cases are gefitinib-susceptible, responses to treatment with gefitinib may be linked to various mutations in the EGFR-TK domain, including the L834R mutation, which increases kinase activity. However, there is evidence that patients with NSCLC with the L834R mutation as the primary cause of the disease can develop acquired resistance to gefitinib and erlotinib, resulting in the T766M mutation.

To date, 26 crystal structures of EGFR-TK, including its wild-type and mutant forms, have been described. These structures show that EGFR-TK exists in active and inactive conformers, which differ in terms of activation loop (A-loop) organization, Asp-Phe-Gly (DFG) motif, L834 and L837, and  $\alpha$ -helix-C orientation [11]. With the aid of the X-ray structures of EGFR-TK bound to erlotinib or gefitinib, important binding interactions of quinazoline moiety to the kinase hinge region have been investigated [12, 13]. These investigations aid in understanding the relationship between EGFR-TK and its inhibitors that is principle in developing novel target-specific kinase suppressors. Target-based virtual screening (VS) is a high-throughput *in silico* drug-discovery approach [14]. Macromolecule-based VS utilizes a molecular docking technique that aids understanding of the three-dimensional (3D) structure of the target protein binding site. In numerous instances including those involving break-point cluster region-abelson murine leukemia (BCR-ABL) TK [15], checkpoint kinase 1(Chk1) [16], FK506 binding protein (FKBP) [17], and protein tyrosine phosphatases [18], structure-based VS methods have been helpful in identifying new inhibitors. A few EGFR-TK receptor-based VS studies against industrial and commercial chemical compounds in the anilinoquinazoline, pyridopyrimidine, and pyrrolopyrimidine families have been described [19].

In our study, we applied the VS study using EGFR-TK receptor-gefitinib complex structure against a diversity set of 350,000 small-molecule compounds (ChemDiv Library DC0, accessed Sep 08, 2022) in order to identify new EGFR inhibitors as potential anti-cancer agents. The process includes ligand- and structure-based pharmacophore mapping, molecular docking approaches in conjunction with post-docking analysis, molecular dynamics (MD) simulations, and molecular mechanics/generalized born surface area calculations (MM/GBSA). The study shed light on the mechanism of EGFR-TK enzyme suppression in four compounds. The EGFR-TK conformational changes observed in the MD simulation and the binding free energies of the compounds, as calculated using the MM/GBSA analysis explored the importance of the hydrophobic and electrostatic characteristics of the ligands for ligand-protein bindings.

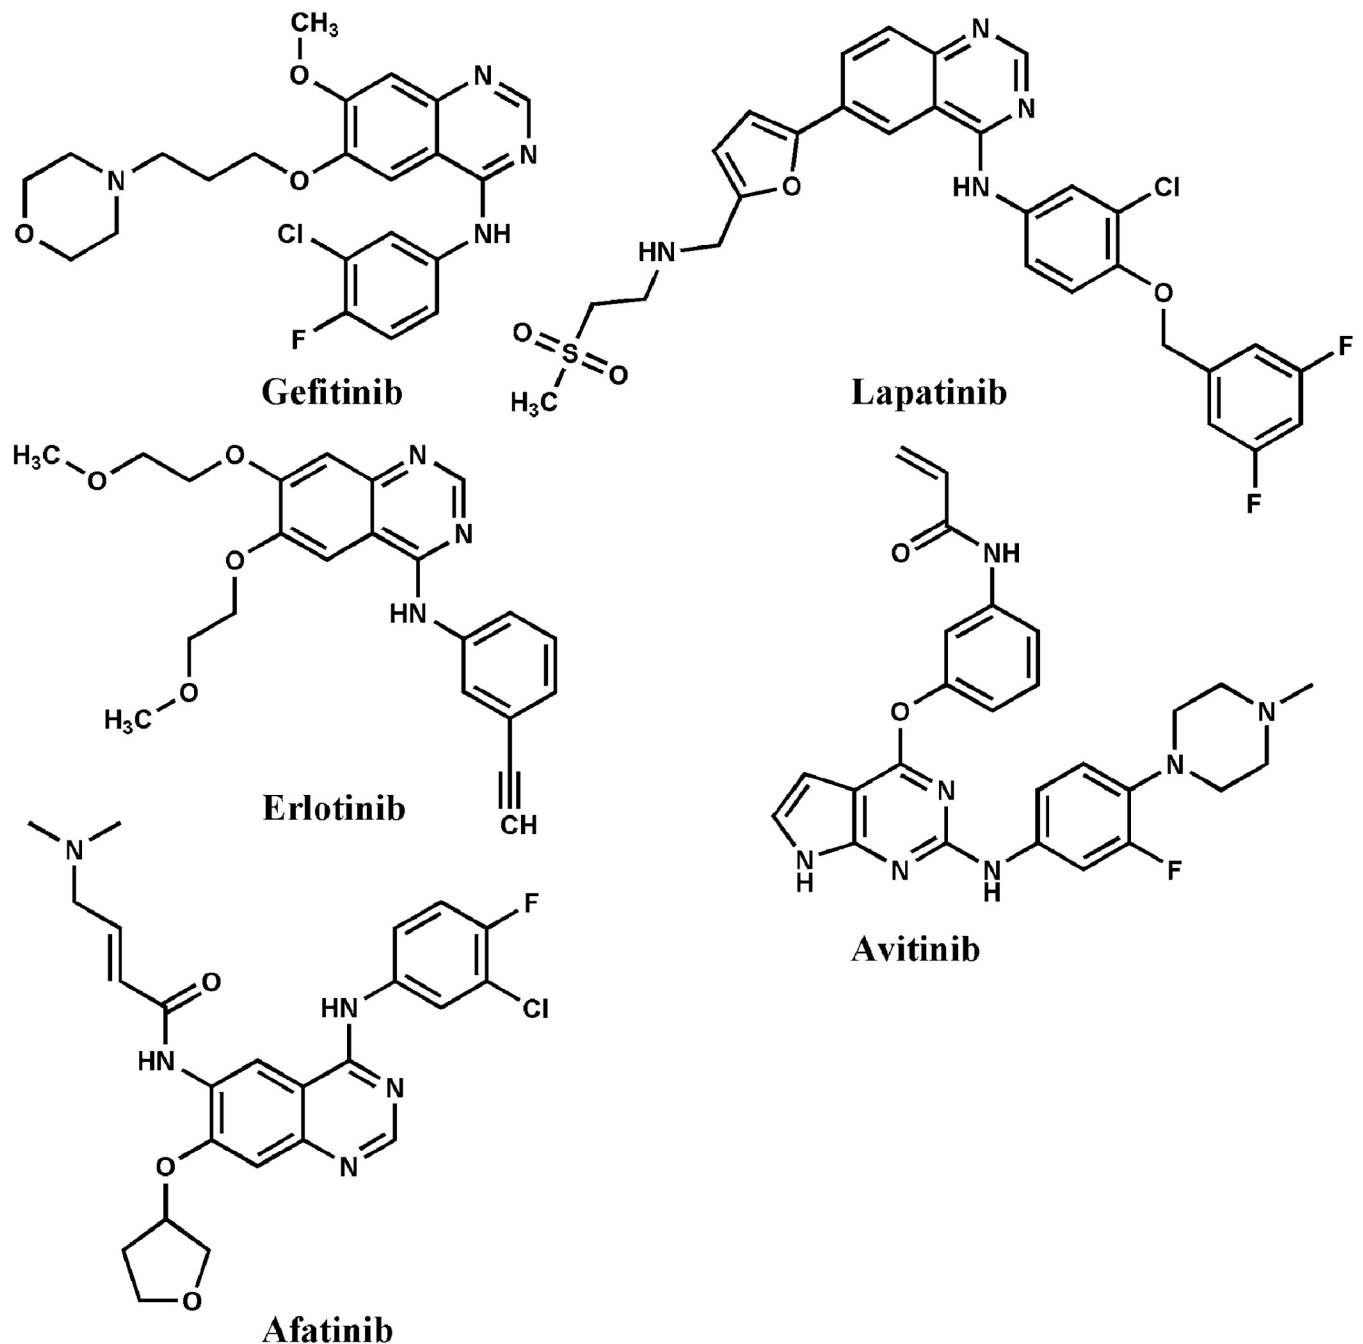

Fig 1. Representative chemical structure of epidermal growth factor receptor (EGFR) kinase inhibitor drugs.

<https://doi.org/10.1371/journal.pone.0298326.g001>

## Methods and procedures

### Preparation of EGFR protein structure and compound dataset

The Protein Database (<http://www.pdb.org> (accessed 23-Dec-2021)) was used to obtain the crystal structure of the EGFR-TK-gefitinib complex (PDB:4wkq) [20]. Missing residues were fixed and the entire protein sequence structure was numbered 694–1020, and the protein sequence structure was modified using Modeler10.4 software by ignoring the three terminal

amino acids 1, 1021, and 1022. The structures of the screening library of 350,000 compounds were obtained from the ChemDiv (<https://www.chemdiv.com/>) (accessed on 1-Jan-2022) online collection using the publicly available discovery chemistry (DC01).

### Ligand-based VS

For drug-like chemical libraries, Ghose et al. recommended qualifying range with the following restrictions: molecular weight between 160 and 480; estimated logP between 0.4 and 5.6; molar refractivity between 40 and 130; and overall atom count between 20 and 70 [21]. A customized Ghose rule was used in screening the dataset using Mwt range of 350–480 and logP 2.5–4.8. LigandScout4.1 [22] was used for structure- and ligand-based database screening on the reduced library subset of 157,850 chemicals. LigandScout extracted gefitinib and its macro-molecular environment from 4wkq PDB files and automatically created a 3D pharmacophore model. In addition, LigandScout was used to generate pharmacophore models based on a small-molecule database injected into the active site and produce docking pose results for VS at the binding site.

### Structure-based VS

Removing the heteroatoms allowed for the preparation of the receptor with the 3D crystallographic structure (PDB: 4wkq). Using AutoDock Vina1.1.2 [23], Autodock 4 [24] and LigandScout program-output library was scored and ranked. Docking process was validated using co-crystallized ligands (xray ligand). The root-mean-square deviation (RMSD) of the xray ligand-structure from its docked conformation was used as a measure in validating the docking protocols. The autotodock4 program grid box dimensions were  $x = 11.138$ ,  $y = 10.5$ , and  $z = 10.5$  Å. The autotodock-vina program grid box dimensions were  $x = 15.529$ ,  $y = 14.712$ , and  $z = 17.414$  Å and exhaustiveness value of 8. The atomic affinity potentials generated on a grid were used to measure the binding energy at each stage of the docking simulation. Using PyMOL software, the compounds' binding conformations were visualized [26].

### MD simulations

Using AmberTools22 package [27] on ubuntu20.04, EGFR-TK-docked ligand complex of the hit compounds ZINC21802765, ZINC21802749, ZINC21802742 or ZINC21802768 was used as initial structures to the MD simulations process. A water box, 10 Å of TIP3P water model, was applied. The particle mesh Ewald was used to calculate long-range electrostatic interactions with the periodic boundary condition imposed. The ff14SB force field, and non-bonding interactions cut-off value 8 Å were assigned [28]. Counter ions and water molecules underwent 1000-cycle minimizations followed with 1000-cycle minimizations of the whole system. At first, the system equilibrated within a simulation time-period of 170 ps. During the first 20 ps, counter ions and water molecules equilibrated while the solutes kept restrained. During the next 50 ps, the amino acid side chains were relaxed and during the last 100 ps the whole system constraints were released. The MD simulations run for 10 ns at 298.15 K and 1 atm pressure using time step of two femtoseconds (fs). Throughout the simulations, 1 ps time-intervals were used to save the atom coordinates in the complex system. The starting structures from the MD simulation were utilized as the reference structures to calculate RMSDs using the CPPTRAJ module of AmberTools18 package to confirm the convergence of the MD simulation procedures. The local flexibility at each amino acid residue could be calculated using root-mean-square fluctuations (RMSFs) and reference structures that represented as average structures over the course of the last four ns trajectories.

## Binding free energy estimation

The EGFR-TK-ligand binding free energy ( $\Delta G_{\text{binding}}$ ) was calculated by the MM/GBSA module [34] using 100 snapshots of the trajectories obtained during the last 4 ns simulation time. The input variables were set for the generalized born method  $\text{igb} = 5$ , salt concentration  $\text{salt-con} = 0.1 \text{ M}$  and the level of output variable  $\text{verbose} = 1$ .

## Per-residue free energy decomposition

Molecular mechanics Poisson–Boltzmann surface area MM/PBSA.py was utilized to realize free binding energy calculations and to execute energy decomposition analysis, using the Poisson–Boltzmann (PB) model from 100 snapshots during the last 4 ns simulation time [23]. The input variables for the Poisson Boltzmann variables, ionic strength  $\text{istrng} = 0.1 \text{ M}$ , internal dielectric constant  $\text{indi} = 1.0$ , nonpolar optimization method  $\text{inp} = 1$ . The variables for the energy decomposition  $\text{idecomp} = 1$  and the level of decomp\_output  $\text{dec\_verbose} = 2$ .

## Biological evaluations

**Materials and cell preparations.** The American Type Culture Collection (Rockville, MD, USA) provided EGFR wild-type lung adenocarcinoma A549 cells and EGFR L858R/T790M double mutant NSCLC H1975 cells. The cells were cultured in 75 or 150 mL tissue culture flasks at 37°C in a 5% CO<sub>2</sub> humidified atmosphere with Dulbecco's modified Eagle's medium (DMEM), phenol red, 10% fetal bovine serum, 200  $\mu\text{M}$  L-glutamine, and 1X antibiotic–antimycotic. For immunofluorescence and flow cytometry, the cells were plated in cell culture plates using DMEM. The stock solutions of all compounds ZINC21802765, ZINC21802749, ZINC21802742 and ZINC21802768 were prepared in DMSO, with the DMSO concentration in each treatment not exceeding 0.1% (v/v).

**Immunofluorescence assay.** H1975 cells were grown for 7 d on glass slides at a density of 20,000 cells/mL before being preserved in 4% formaldehyde. Compound ZINC21802765, ZINC21802749, ZINC21802742 or ZINC21802768 was added to H1975 cells. Following primary antibody staining for the cell signaling molecules EGFR and p-EGFR, fixed cells were next labeled with FITC-conjugated secondary antibodies and 1  $\mu\text{g/mL}$  4'-6-diamidino-2-phenylindole (DAPI), a fluorescent stain for nuclear DNA. Each antibody was added to each sample in triplicate. A BD Pathway 855 Bioimager (BD, Franklin Lakes, NJ, USA) was used to analyze the fluorescence staining intensity and intracellular localization (v/v).

**Apoptosis assay.** By employing a flow cytometer and the Vybrant apoptosis test kit (Annexin V, APC conjugate; Molecular Probes, Thermo Fisher Scientific, Waltham, MA, USA), the percentage of cells experiencing apoptosis in response to the tested compounds ZINC21802765, ZINC21802749, ZINC21802742 or ZINC21802768 and gefitinib, a reference medication, was calculated. A549 and H1975 cells that had been exposed to the test substances for 48 h were collected, pelleted, and resuspended in DMEM. A total of 104 cells were collected, stained with annexin V and DAPI to detect viability, and immediately examined on a BD LSRII Flow Cytometer (BD). If the cells tested negative for both Annexin V and DAPI, they were considered viable.

**Statistical analysis.** All results were presented as mean  $\pm$  SEM. Student's t-test using Excel<sup>®</sup> was carried out to assess which treatment groups show significant differences from the control ones. The differences were considered significant when  $p < 0.05$ .

## Results and discussion

### Library establishment

Fig 2 shows a flowchart of the VS procedure. The publicly available Discovery Chemistry, ChemDiv compound library (DC01), was used to obtain a combined dataset of 350,000 compounds. Selected candidates with good drug-like properties according to Ghose-rule[21] screening constituted a virtual library of 157,850 compounds.

### Ligand structure-based database screening

A pharmacophore is a spatial arrangement of functional groups or atoms that describes how a binder interacts with the binding site of a target protein. The pharmacophore theory assumes that the pharmacophores of compounds that share a binding site are identical. [21]. There are two pharmacophore modeling methods based on the knowledge available regarding ligands and receptors. Ligand-based methods involve the extraction of a common 3D-arrangement of chemical characteristics from a known diverse set of compounds that have similar binding mode to a certain macromolecule structure. However, a structure-based protocol requires the 3D structure of the active site or a target–ligand complex. Using the 3D structure of the EGFR–gefitinib complex (4wkq) [20], the LigandScout program [22] was used to build a pharmacophore model by the survey of the paired chemical characteristics of the binding site and their spatial organization around the binders. The resulting pharmacophore model consisted of two aromatic rings, one hydrophobic ring, and one hydrogen acceptor (Fig 3). LigandScout analysis decreased the library set to 610 hits (Supplementary File 1) based on pharmacophore score value.

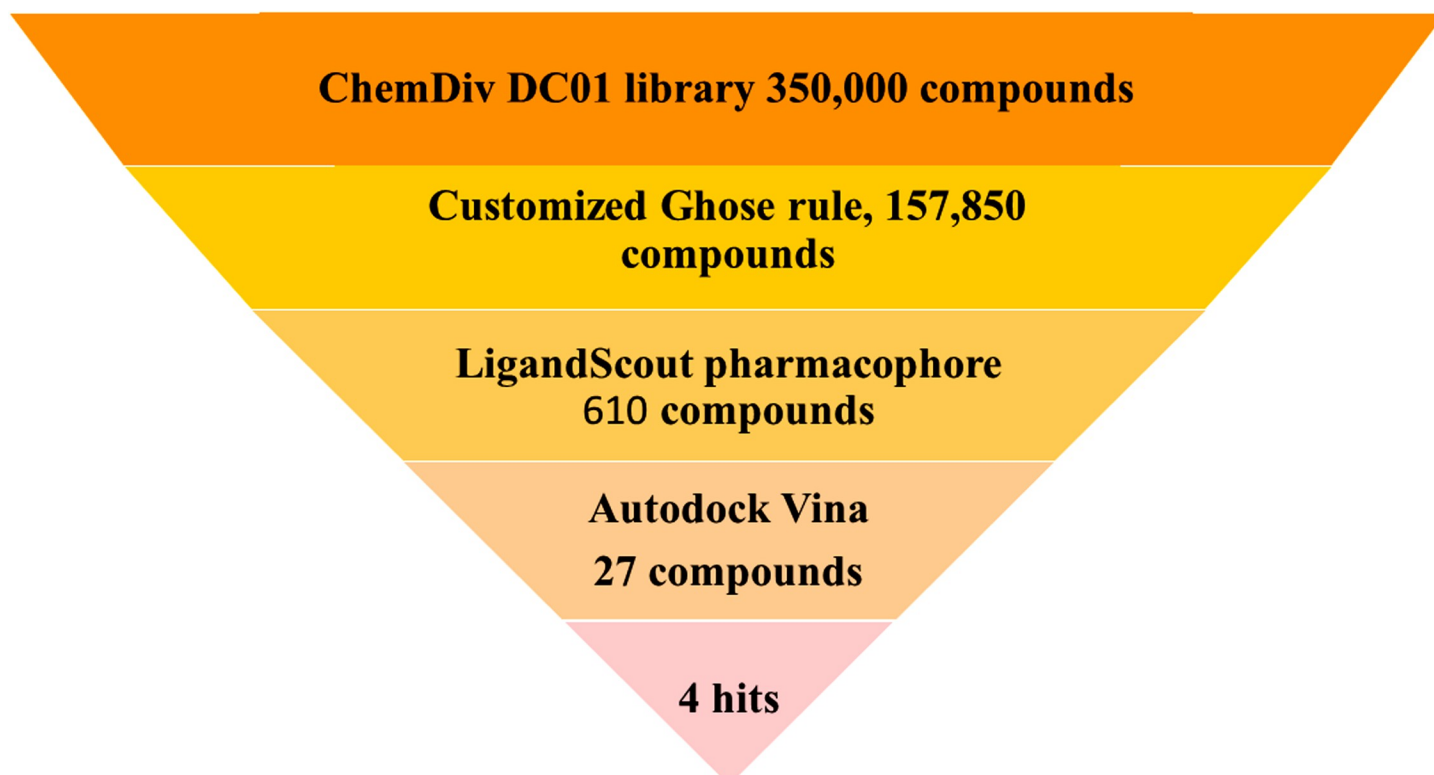

Fig 2. Schematic representation of the virtual screening process.

<https://doi.org/10.1371/journal.pone.0298326.g002>

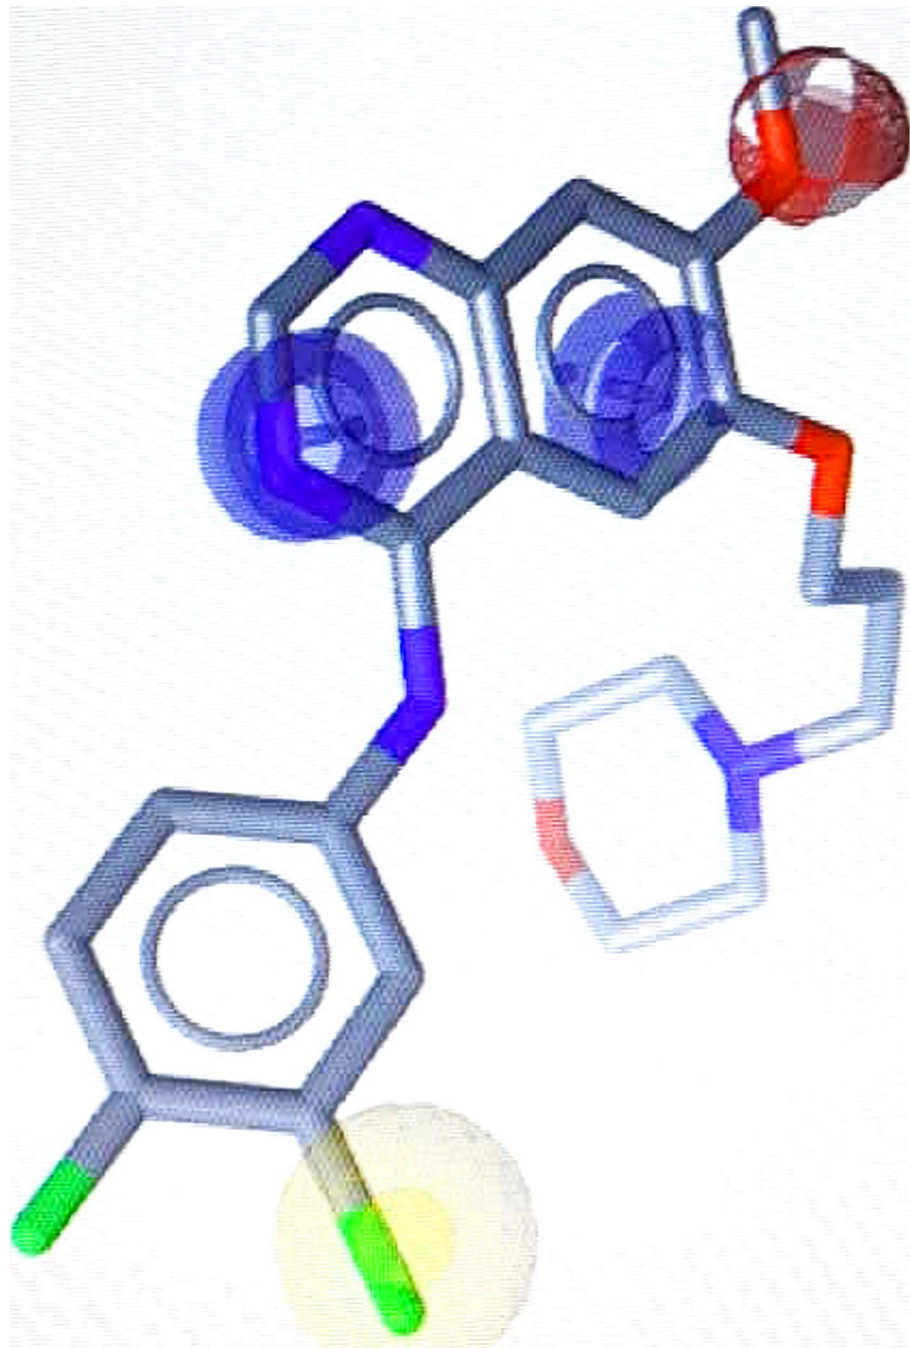

**Fig 3. Ligand structure-based pharmacophore model of the gefitinib 4wkq.pdb structure.** Hydrogen acceptor (red sphere), aromatic ring (blue circles) and hydrophobe (yellow sphere).

<https://doi.org/10.1371/journal.pone.0298326.g003>

### Database search using docking studies

The processed ligand set was docked using a consensus-docking approach [23]. This strategy is both feasible and affordable. The root mean square deviation (RMSD) between AutoDock Vina1.1.3 [24] and Autodock 4.2 [25] binding modes ( $\text{RMSD} \leq 2$ ) predicted for each complex yielded a small collection of 27 molecules with high scores, 4 of which had top docking scores

in both Autodock Vina1.1.2 ( $-10.8$ :  $-9.5$  Kcal $^{-1}$ ) and Autodock 4.2 ( $-11.4$ :  $-9.28$  Kcal $^{-1}$ ) (Supplementary File 2) and were selected. The 2D structures, zinc ID numbers, and molecular weights of the four hit compounds are listed in Table 1. The hit compounds were hybrids of [1,2,4]triazolo[1,5-a]pyrimidin-7-one and a 2-(4-substitutedpiperazin-1-yl)-2-oxoethyl fragment.

### Binding conformation of the hit compounds

The selected hit compounds, ZINC21802765, ZINC21802749, ZINC21802742, and ZINC21802768 (Table 1), had a common scaffold skeleton, 2-phenyl-4H,7H-[1,2,4]triazolo[1,5-a]pyrimidin-7-one, which plays main role in the binding of ligands to proteins. For compounds ZINC21802765, ZINC21802749, and ZINC21802742, the pyrimidinone oxygen atom engaged in hydrogen bonding with Met793 and explored  $\pi$ -cation interactions the  $\pi$ -system of phenyl ring to the positive amino group of Lys745, while hydrophobic contacts were present between the 4-[2-oxo-2-(4-phenylpiperazin-1-yl)ethyl] moiety and Leu718, Cys797, and Val726 in the central hydrophobic region. In contrast, compound ZINC21802768 exhibited a hydrogen bond to Met793 and hydrophobic interactions to the hydrophobic side chains of the binding-site residues (Fig 4).

**MD Simulations.** Using AmberTools22 [26] EGFR-TK-docked ligand complexes of the selected compounds, ZINC21802765, ZINC21802749, ZINC21802742, and ZINC21802768, were used to compute the binding affinity and stability of the protein-ligand complex structures. All complexes were subjected to MD simulations, MM/GBSA [27] binding energy calculations, and molecular mechanics/Poisson-Boltzmann surface area (MM/PBSA) per-residue energy decomposition [28] to identify amino acid residues critical for in silico prediction of EGFR-TK-ligand binding affinity. It should be highlighted that docking studies, whether rigid or semi-flexible, provide a single snapshot of the interactions between ligands and proteins. Consequently, to better understand how the complex interaction profile is affected by protein structural variations and flexibility, the docked minimized complexes underwent 10 ns MD simulation time frames. The dynamic stabilities were determined using the RMSD changes

**Table 1. Results of the docking studies of the four selected hit molecules with the EGFR-TK protein.**

| ZINC ID / IUPAC name                                                                                                                         | Chemical formula (Mwt.)                                                   | Docking energy (Kcal mol $^{-1}$ ) |              |                     | H-Bonds | $\pi$ -Cation interactions | Hydrophobic interactions                                               |
|----------------------------------------------------------------------------------------------------------------------------------------------|---------------------------------------------------------------------------|------------------------------------|--------------|---------------------|---------|----------------------------|------------------------------------------------------------------------|
|                                                                                                                                              |                                                                           | Autodock Vina1.1.2                 | Autodock 4.2 | Estimated IC50 (nM) |         |                            |                                                                        |
| ZINC21802765<br>5-methyl-2-(2-methylphenyl)-4-[2-oxo-2-(4-phenylpiperazin-1-yl)ethyl]-4H,7H-[1,2,4]triazolo[1,5-a]pyrimidin-7-one            | C <sub>25</sub> H <sub>26</sub> N <sub>6</sub> O <sub>2</sub><br>(442.51) | -10.8                              | -11.4        | 787.87              | Met793  | Lys745                     | Val726, Ala743, Lys745, Thr790, Met793, Leu844,                        |
| ZINC21802749<br>5-methyl-2-(2-methylphenyl)-4-[2-(4-methylpiperazin-1-yl)-2-oxoethyl]-4H,7H-[1,2,4]triazolo[1,5-a]pyrimidin-7-one            | C <sub>19</sub> H <sub>22</sub> N <sub>6</sub> O <sub>2</sub><br>(380.2)  | -10.5                              | -11.1        | 674.28              | Met793  | Lys745                     | Val726, Ala743, Lys745, Thr790, Leu792, Met793, Leu844                 |
| ZINC21802742<br>4-[2-[4-(4-fluorophenyl)piperazin-1-yl]-2-oxoethyl]-5-methyl-2-(2-methylphenyl)-4H,7H-[1,2,4]triazolo[1,5-a]pyrimidin-7-one  | C <sub>25</sub> H <sub>25</sub> FN <sub>6</sub> O <sub>2</sub><br>(460.5) | -10.3                              | -10.05       | 446.41              | Met793  | Lys745                     | Val726, Ala743, Lys745, Met766, Thr790, Met793, Asn842, Leu844         |
| ZINC21802768<br>4-[2-[4-(2-methoxyphenyl)piperazin-1-yl]-2-oxoethyl]-5-methyl-2-(2-methylphenyl)-4H,7H-[1,2,4]triazolo[1,5-a]pyrimidin-7-one | C <sub>25</sub> H <sub>26</sub> N <sub>6</sub> O <sub>2</sub><br>(472.55) | -9.5                               | -9.28        | 361.43              | Met793  |                            | Leu718, Val726, Val726, Lys745, Leu792, Met793, Leu844, Thr854, Asp855 |

<https://doi.org/10.1371/journal.pone.0298326.t001>

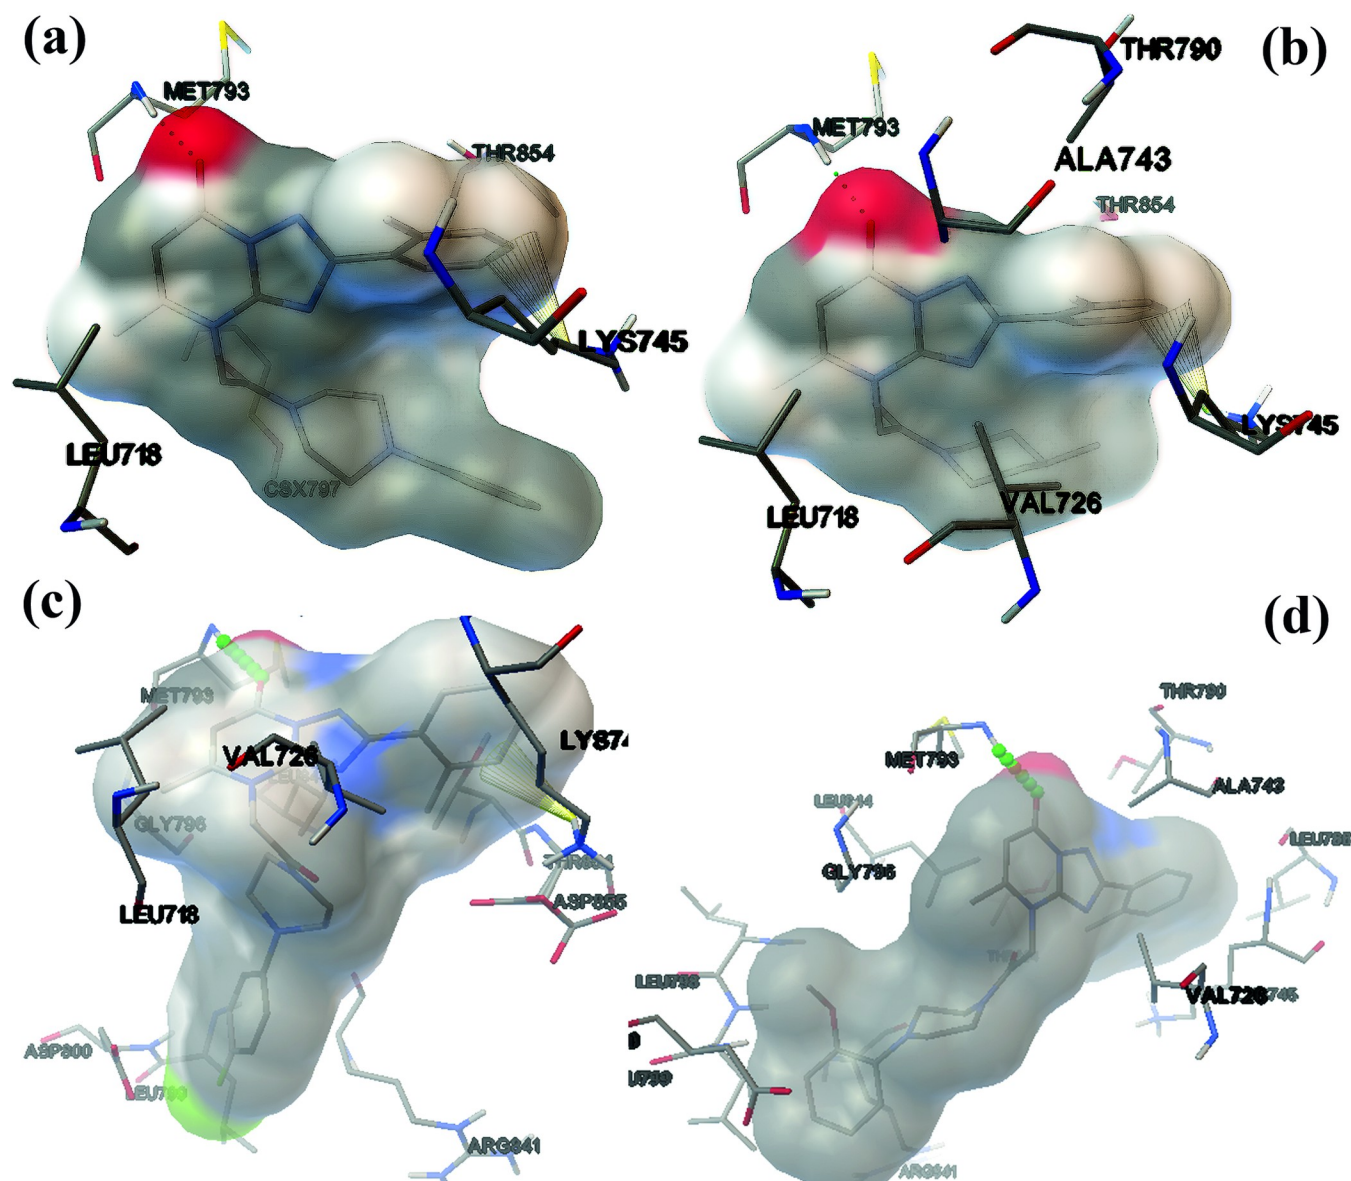

**Fig 4.** Autodock results of EGFR-TK with ZINC21802765 (a); ZINC21802749 (b); ZINC21802742 (c); ZINC21802768 (d). Hydrogen bonds in dotted lines;  $\pi$ -Cation interactions in yellow cone shape.

<https://doi.org/10.1371/journal.pone.0298326.g004>

during the MD simulations. Throughout the last 4 ns, the protein and ligand structures of the four complexes (Fig 5) equilibrated, with no apparent RMSD fluctuations.

The per-residue root mean square fluctuation of EGFR-TK–ligand complexes over the last 4ns simulation period shows the least flexible residues numbers 50–150 (original xray numbers 743–853) that suggest the great impact of these residues on the binding of the EGFR-TK receptor to the ligands (Fig 6).

The analysis of the crystal structure of EGFR-gefitinib (pdb id: 4wkq) revealed a contact distance to the side chain of Thr854 and a hydrogen bond bridge that connected the nitrogen atom of the pyrimidine ring of gefitinib to the Thr854 side chain via a water molecule Fig 7. According to recent reports, erlotinib-induced tyrosine phosphorylation inhibition was eliminated by the EGFR T854A mutation, leading to the development of erlotinib drug resistance

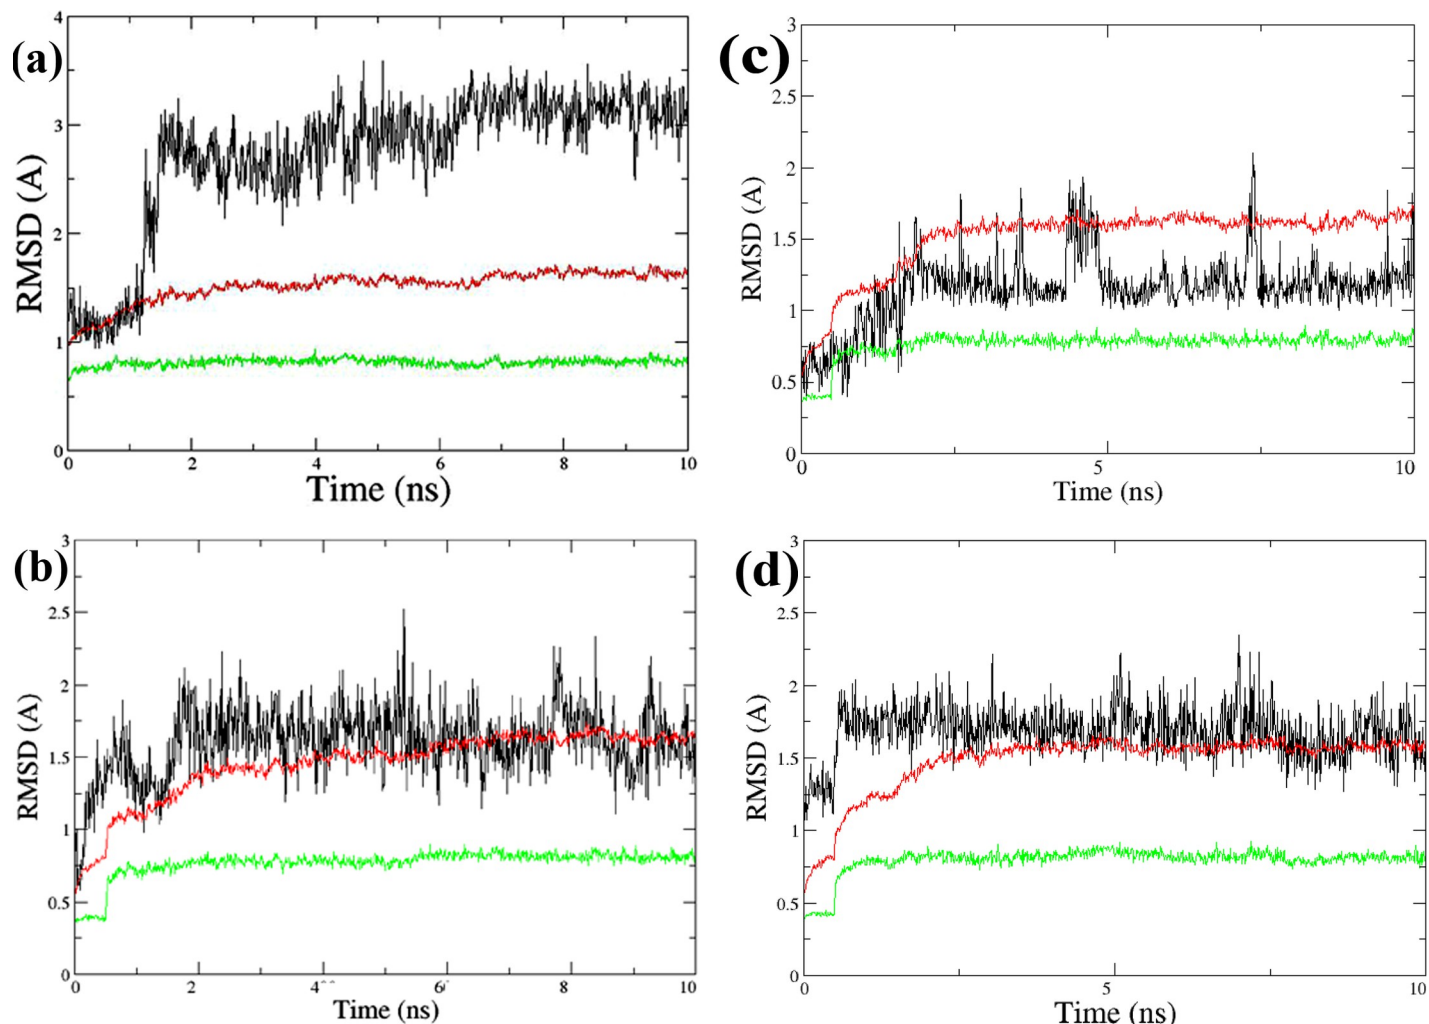

**Fig 5.** RMSD in MD simulations, showing protein backbones (green lines), protein all atoms (red lines), and ligands (black lines) for ZINC21802765 (a), ZINC21802749 (b), ZINC21802742 (c), ZINC21802768 (d).

<https://doi.org/10.1371/journal.pone.0298326.g005>

[29]. Thr854 is found in the EGFR activation loop [30]. It may be possible to achieve more kinase selectivity in this binding form by combining interaction with the Met790 side chain with a hydrogen-bonding connection with Thr854 [31].

In our study, the program for processing coordinate trajectories and data files, CPPTRAJ [32], showed the hydrogen bonds with high occupancy for the four simulation systems during the final 4 ns equilibration time frame, as shown in Table 2 and Fig 8. For the ZINC21802765–EGFR-TK complex Fig 8A, the amino acid residues Met793 and Cys797 formed a very stable hydrogen bond with the ligand, with occupancies of 95% and 84%, respectively. For ZINC21802749–EGFR-TK Fig 8B, amino acid residues Met793 and Cys797 formed stable hydrogen bonds with the ligand, with 86% occupancy. Moreover, ZINC21802749 explored hydrogen bond bridge (same hydrogen bond profile of gefitinib xray structure) between the nitrogen atom of its triazole ring to Thr854 side chain via a water molecule that suggests its significant EGFR-Tk inhibitor activity and potential selectivity. On the other hand, the remaining three compounds ZINC21802765, ZINC21802742, ZINC21802768 failed make hydrogen bond bridge between the nitrogen atom of its triazole ring to Thr854 side chain via a water

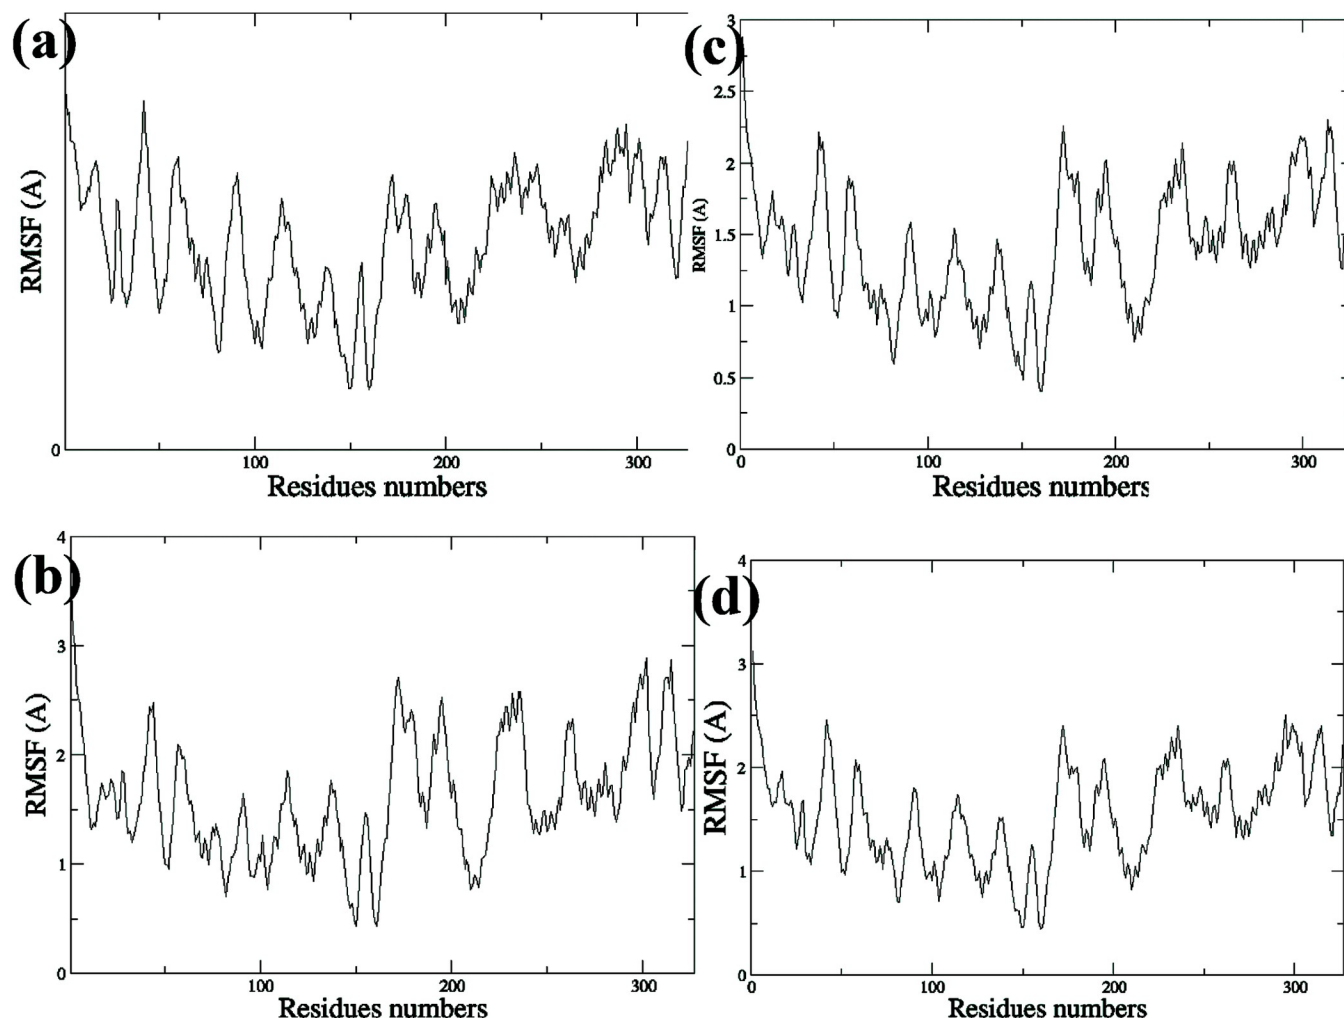

**Fig 6.** Per-residue root mean square fluctuation of EGFR-TK-ligand complexes over all simulations times. Protein complex with ZINC21802765 (a), ZINC21802749 (b), ZINC21802742 (c), ZINC21802768 (d).

<https://doi.org/10.1371/journal.pone.0298326.g006>

molecule. This is could attributed to the bulk un(substituted)phenyl ring attached to piperazine nitrogen that increase the whole volume of the molecule that inside the ATP binding pocket that prevent the structure to orient near Thr854 at a distance enough for water-mediated bridge hydrogen bonding.

For ZINC21802742-EGFR-TK [Fig 8C](#), the amino acid residues Met793 and Cys797 showed strong hydrogen bonds with the ligand, with occupancies of 83% and 77%, respectively. For ZINC218022768-EGFR-TK [Fig 8D](#), the amino acid residues Met793 and Cys797 showed moderate hydrogen bonding with the ligand, with occupancies of 52% and 53%, respectively. The 2-methoxyphenyl moiety in ZINC218022768 structure was oriented between the side chains of Arg841 and Phe723. This orientation and the electronic effect of the methoxy group (positive inductive and mesomeric effects) may have a role in the weak inhibitor activity of the compound and it is suggested for further study and consideration.

**Binding free energy estimation.** Using 100 snapshots obtained from the final simulation trajectories, the binding efficiencies of the hit compounds were estimated using the MM/GBSA method ([Table 2](#)). The most active compounds, ZINC21802765 and ZINC21802749,

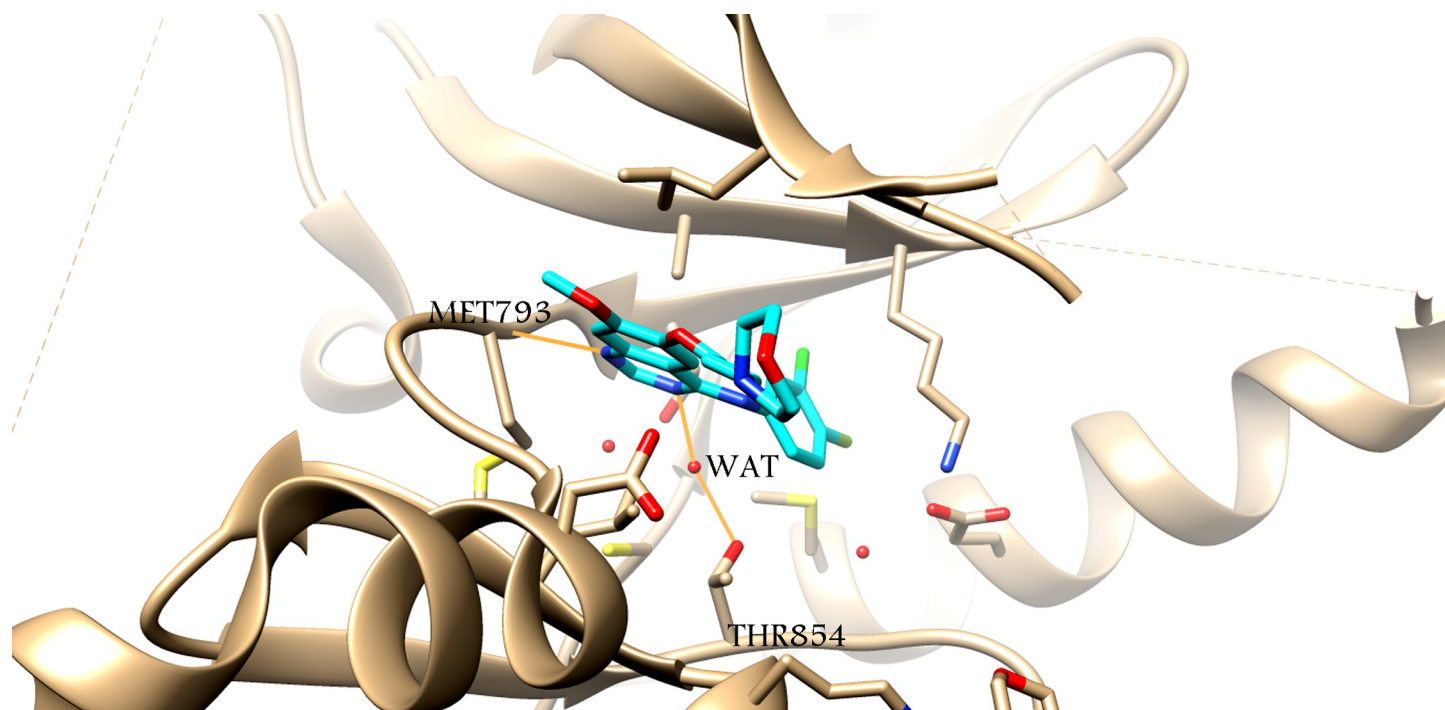

**Fig 7. X-ray structure of EGFR-gefitinib (4wkq).** Gefitinib structure (cyan stick), amino acids side chains (beige sticks), water molecules (red spheres).

<https://doi.org/10.1371/journal.pone.0298326.g007>

showed preferred binding energies of  $-63.4480$  and  $-61.5184$  kcal mol $^{-1}$  respectively. For all ligands, the vdW interaction energy values were two to three times those of the electrostatic interactions. The results in accordance with prior research on a number of small-molecule therapeutic kinase inhibitors, including olmutinib, lapatinib, and icotinib [33, 34].

### Per-residue free energy decomposition

The MM/PBSA analysis was used in identifying the amino acid residues crucial for effective binding to the EGFR-TK active site [35,36]. For the active hit compounds, EGFR-TK- ZINC21802765 and EGFR-TK- ZINC21802749 complexes, the residues Val726, Leu792, Met793, Gly796, Cys797, Leu798, and Leu844 showed decomposition energy values in the range of  $-2.025$  to  $-3.194$  kcal mol $^{-1}$  and  $-2.082$  to  $-3.595$  kcal mol $^{-1}$  respectively. For the partial active compound, EGFR-TK- ZINC21802742 complex, the residues Leu792, Met793, Gly796, Cys797, and Leu844 showed decomposition energy values in the range of  $-2.0$  to  $-$

**Table 2. Binding free energy results of MM/GBSA calculations (kcal mol $^{-1}$  <sup>a</sup>).**

| Compounds    | Hydrogen bond (occupancy %) | $\Delta G_{vdw}$ | $\Delta G_{elec}$ | $\Delta G_{polar}^b$ | $\Delta G_{surf}^c$ | $\Delta G_{MMGBSA}$ |
|--------------|-----------------------------|------------------|-------------------|----------------------|---------------------|---------------------|
| ZINC21802765 | Cys797 (95.8) Met793 (84.0) | -60.5632         | -29.7624          | 34.0888              | -7.2112             | -63.4480            |
| ZINC21802749 | Cys797 (86.6) Met793 (85.0) | -60.1177         | -29.3884          | 34.9215              | -6.9337             | -61.5184            |
| ZINC21802742 | Cys797 (83.8) Met793 (77.2) | -56.6452         | -23.6452          | 28.0661              | -6.4519             | -58.6762            |
| ZINC21802768 | Cys797 (52.4) Met793 (53.6) | -52.3461         | -19.6195          | 23.3532              | -6.1635             | -54.7760            |

<sup>a</sup> Average of 1000 frames

<sup>b</sup> Whole electrostatic contribution:  $\Delta G_{elec} = \Delta G_{electrostatic} + \Delta G_{polar}$

<sup>c</sup> Whole nonpolar contribution:  $\Delta G_{np} = \Delta G_{vdw} + \Delta G_{surf}$

<https://doi.org/10.1371/journal.pone.0298326.t002>

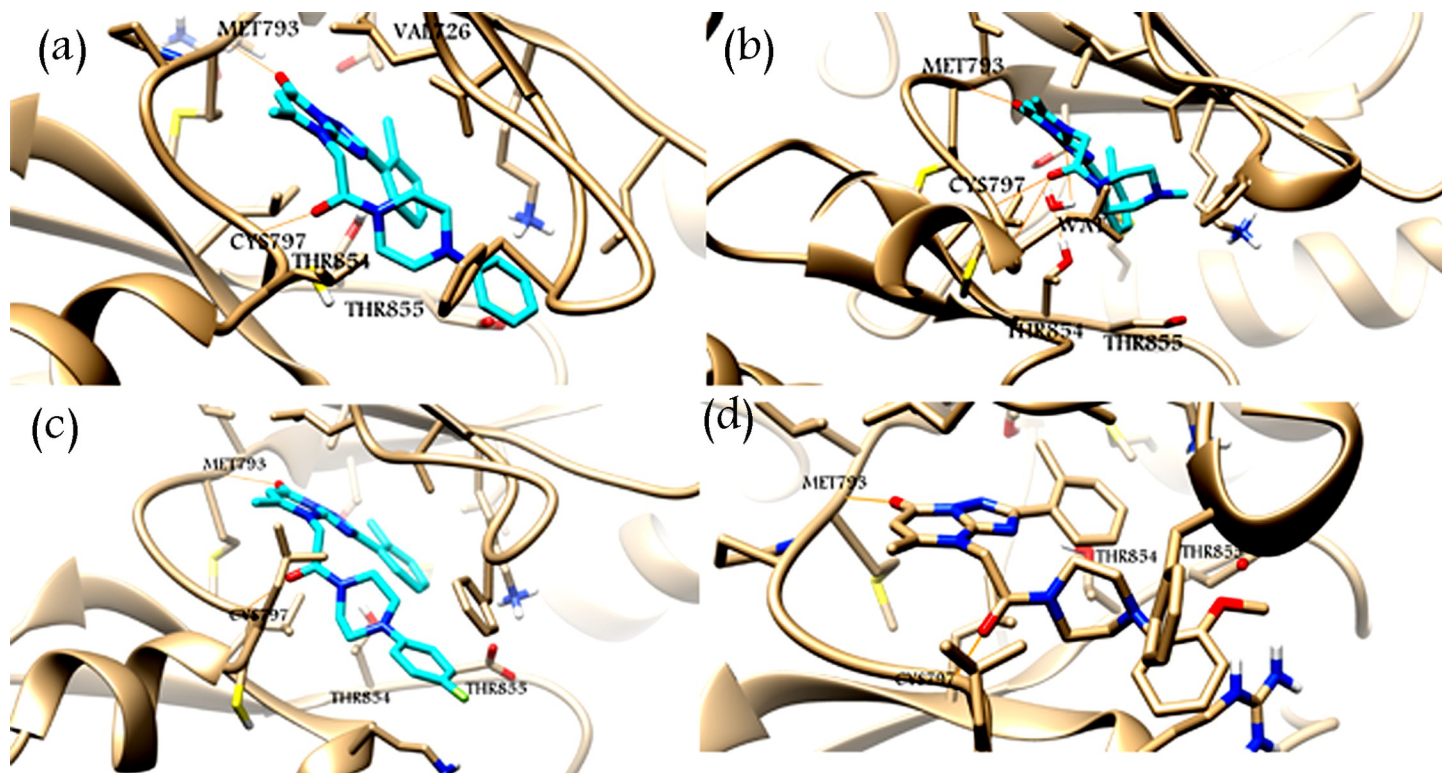

**Fig 8.** Average structures of EGFR-ligand complexes obtained during the final snapshots (4 ns) of MD simulations. The ligands are cyan colored sticks of ZINC21802765 (a), ZINC21802749 (b), ZINC21802742 (c) and ZINC21802768 (d).

<https://doi.org/10.1371/journal.pone.0298326.g008>

2.985 kcal mol<sup>-1</sup>. For the weak active hit compound, EGFR-TK- ZINC21802768 complex the residues Gly796 and Leu798 showed decomposition energy values in the range of -2.013 to -2.45 kcal mol<sup>-1</sup> (Table 3).

## Biological evaluations

**EGFR phosphorylation inhibition.** Epidermal growth factor receptor (EGFR) is an oncogenic tyrosine kinase receptor that driving the initiation and progression of non-small-cell lung cancer (NSCLC) [37]. First-generation EGFR-tyrosine kinase inhibitors (TKIs) such as gefitinib and erlotinib reversibly bind to the ATP cleft within the EGFR kinase domain to block auto phosphorylation of EGFR [38]. Several autocrine growth factors, including as EGF and TGF $\alpha$ , promote EGFR. Here, we evaluated the anti-EGFR activity of the hit compounds by inhibiting EGF-induced phosphorylation. The activity of hit compounds was examined by inhibiting EGF-induced EGFR phosphorylation and confirmed by immunofluorescence assay in H1975 cells. Staining of untreated and compound-treated cells by total and phosphorylated

**Table 3.** Results of per-residue energy decomposition analysis (kcal mol<sup>-1</sup>).

| EGFR-TK residues | Val726 | Leu792 | Met793 | Gly796 | Cys797 | Leu798 | Leu844 |
|------------------|--------|--------|--------|--------|--------|--------|--------|
| ZINC21802765     | -2.562 | -2.025 | -2.753 | -3.194 | -2.057 | -2.471 | -2.641 |
| ZINC21802749     | -2.845 | -2.948 | -2.237 | -2.773 | -2.455 | -2.082 | -3.595 |
| ZINC21802742     | -2.0   | -1.024 | -2.418 | -2.088 | -2.179 | -1.498 | -2.985 |
| ZINC21802768     | -1.384 | -1.805 | -1.463 | -2.450 | -1.030 | -2.130 | -1.158 |

<https://doi.org/10.1371/journal.pone.0298326.t003>

EGFR antibodies, showed complete inhibition of EGFR phosphorylation by ZINC21802765 and ZINC21802749. Partial inhibition was detected with ZINC21802742 and no activity was observed with ZINC21802768 treatment (Fig 9). Interestingly, both ZINC21802765 and ZINC21802749 inhibited the total EGFR and phosphorylated expression which, indicated full coverage on the drug target. Compounds ZINC21802765 and ZINC21802749 with complete inhibition of wild type EGFR possess a phenyl or methyl group respectively at the 4-position of piperazine moiety, these two compounds possess phenyl or methyl group respectively. On the other hand, compounds ZINC21802742 and ZINC21802768 with either partial or no inhibitor activity respectively of wild type EGFR possess p-fluorophenyl or o-methoxyphenyl group at the 4-position of piperazine moiety. These results suggest the smaller the group at 4-position of piperazine the better the inhibitory activity of the compound.

**Induction of apoptosis.** We first sought to investigate whether the inhibition of hit compounds on EGFR phosphorylation will lead to inhibit the survival of lung cancer cells. Therefore, we assessed the efficacy of hit compounds induced apoptosis on H1975 cells as a marker of cell killing and decreased cell survival. For this purpose, cells were treated with the indicated hit compounds in 1  $\mu$ M for 48 hrs, thereafter the percentage of cells underwent apoptosis was

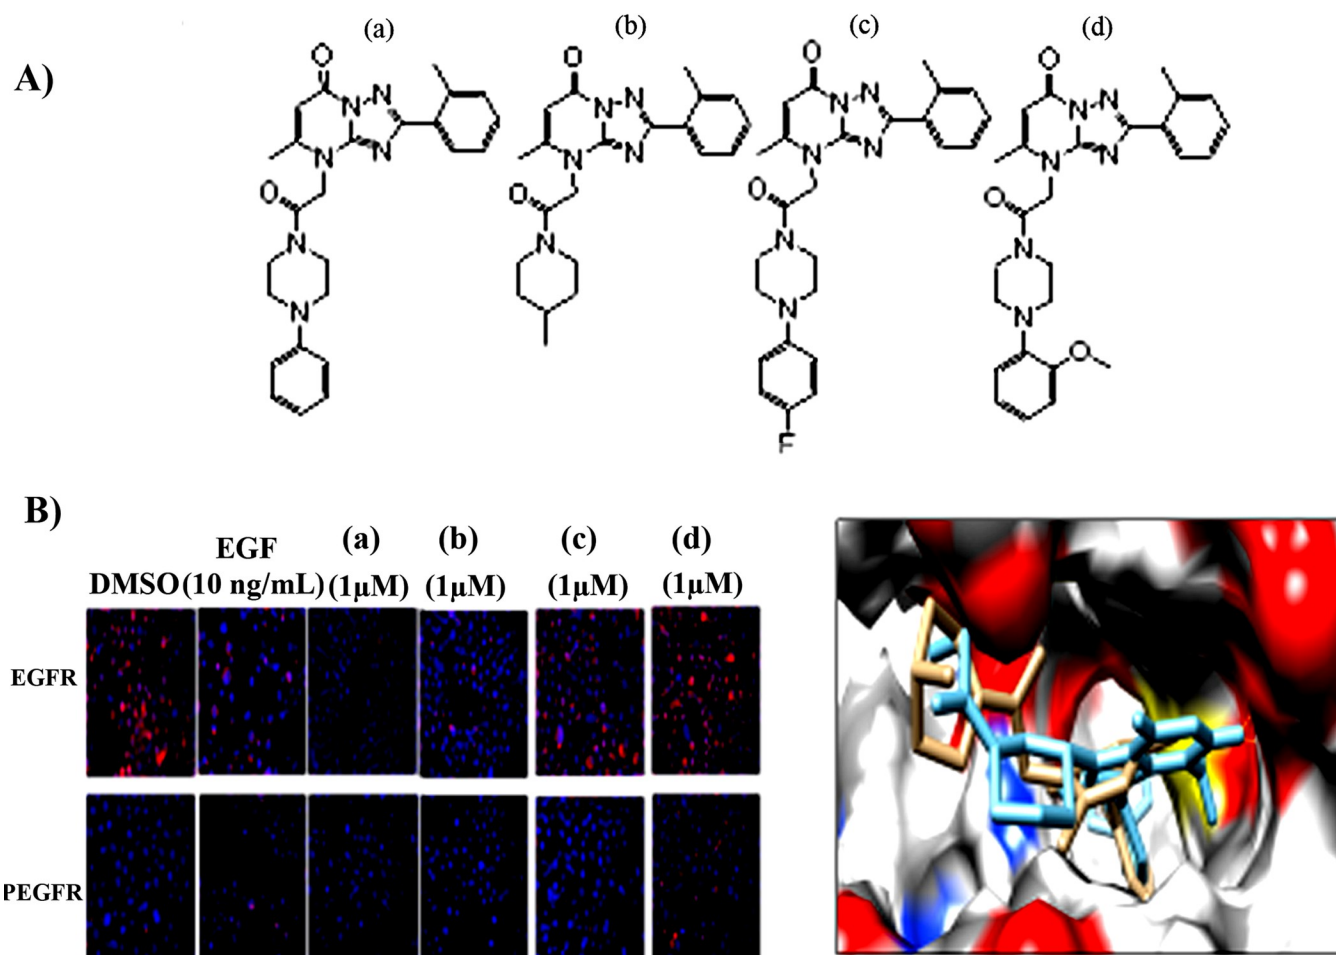

**Fig 9.** A) Hit compounds ZINC21802765 (a), ZINC21802749 (b), ZINC21802742 (c), and ZINC21802768 (d). B) Staining of H1975 cells with EGFR and PEGFR. Compounds a, b, and c inhibit the autophosphorylation of EGFR induced by EGF (10 ng/mL) treatment. H1975 cells were stained with primary antibodies against EGFR/p-EGFR (magenta) followed by secondary antibodies and DAPI (red). Thereafter, the constituted EGFR and PEGFR proteins and localization were determined by immunofluorescence assay.

<https://doi.org/10.1371/journal.pone.0298326.g009>

determined by flow cytometry. Treatment with compounds ZINC21802765, ZINC21802749, ZINC21802742, and ZINC21802768 induced efficient apoptosis as shown in Fig 10. Hit compounds showed increase in apoptosis percentage by 20.6, 22, 25 and 26% compared with 10% in mock treated cells. Unlike the inhibition of EGFR phosphorylation, the induction of apoptosis was shown to be independent of EGFR inhibition activity. Furthermore, effective response and good clinical outcomes of EGFR inhibitors, enable their use as the first-line setting for patients with advanced NSCLC harboring activating EGFR mutation (a deletion in exon 19 or the L858R mutation in exon 21) [39, 40]. However, NSCLC patients initially response to these EGFR-TKIs almost invariably develop drug resistance [41], which commonly arise through the acquisition of a second-site mutation (T790 M) within EGFR, or via activation of compensatory signaling pathways that bypass receptor and restore downstream oncogenic signaling [42]. Therefore, we sought to evaluate the induction of apoptosis using H1975 cells harboring the EGFR L858R/T790M double mutation and A549 cells that harboring wild-type EGFR. ZINC21802765 and ZINC21802749 the most active hits were used and compared with the EGFR inhibitor reference drug Gefitinib. The treatment showed a persistent apoptosis-inducing effect on mutant EGFR H1975 cells and increased the percentage of apoptosis by 20.5 and 22%, respectively. In higher concentration by 2  $\mu$ M, the apoptosis percentage was increased by 21 and 25.8%, respectively. Both hit compounds are more effective than gefitinib by at least one fold in inducing cell killing toward mutant EGFR H1975 but not on wild-type A549 cells as shown in (Fig 11). Taken together, the biological evaluation results of hit compounds showed inhibition of EGFR and selective apoptosis-induced effects on mutant cells, rather than on wild-type lung cancer cells.

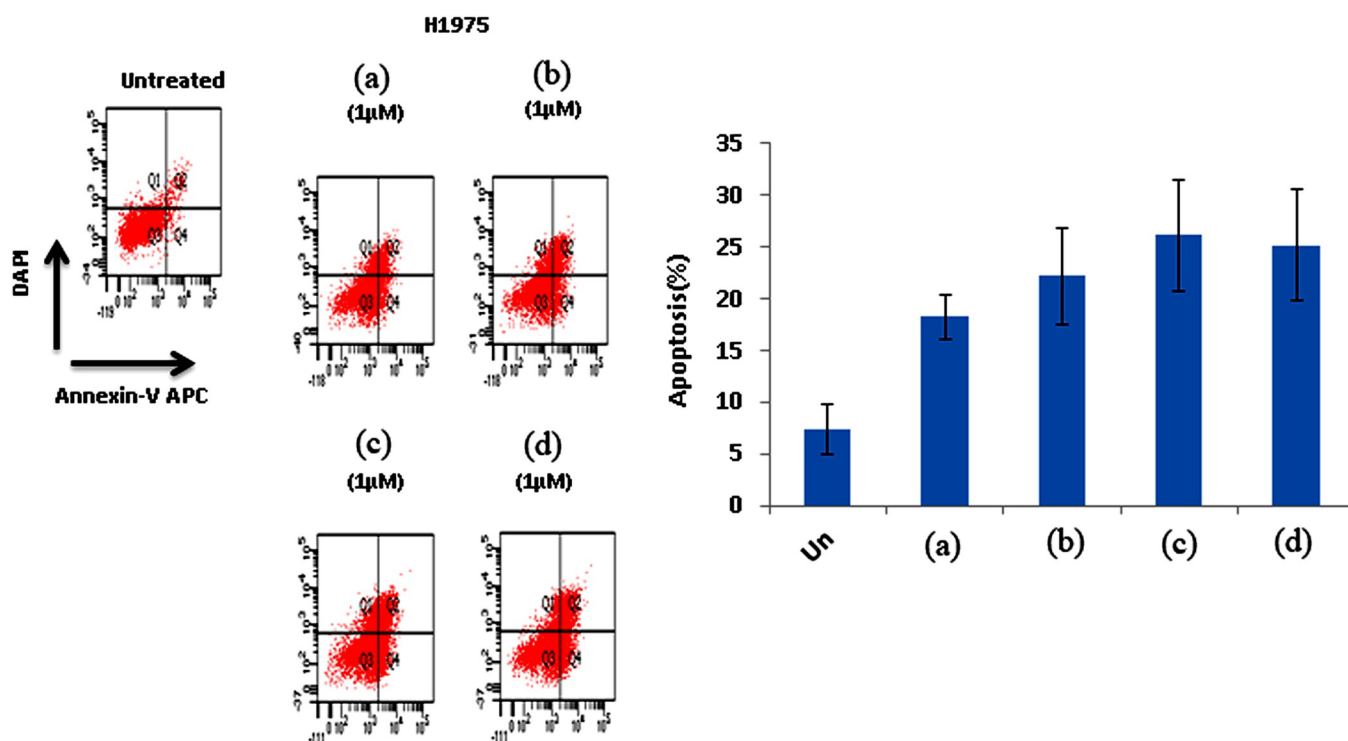

**Fig 10. Apoptosis induction effect of compounds.** The cells were collected and then stained with annexin V-APC/DAPI. The percentage of cells underwent to apoptosis was then analyzed on a LSRII Flow Cytometer. One of the three representative experiments using different cell preparations was only shown. The values represent mean  $\pm$  SEM (n = 3). Compounds are ZINC21802765 (a), ZINC21802749 (b), ZINC21802742 (c), and ZINC21802768 (d).

<https://doi.org/10.1371/journal.pone.0298326.g010>

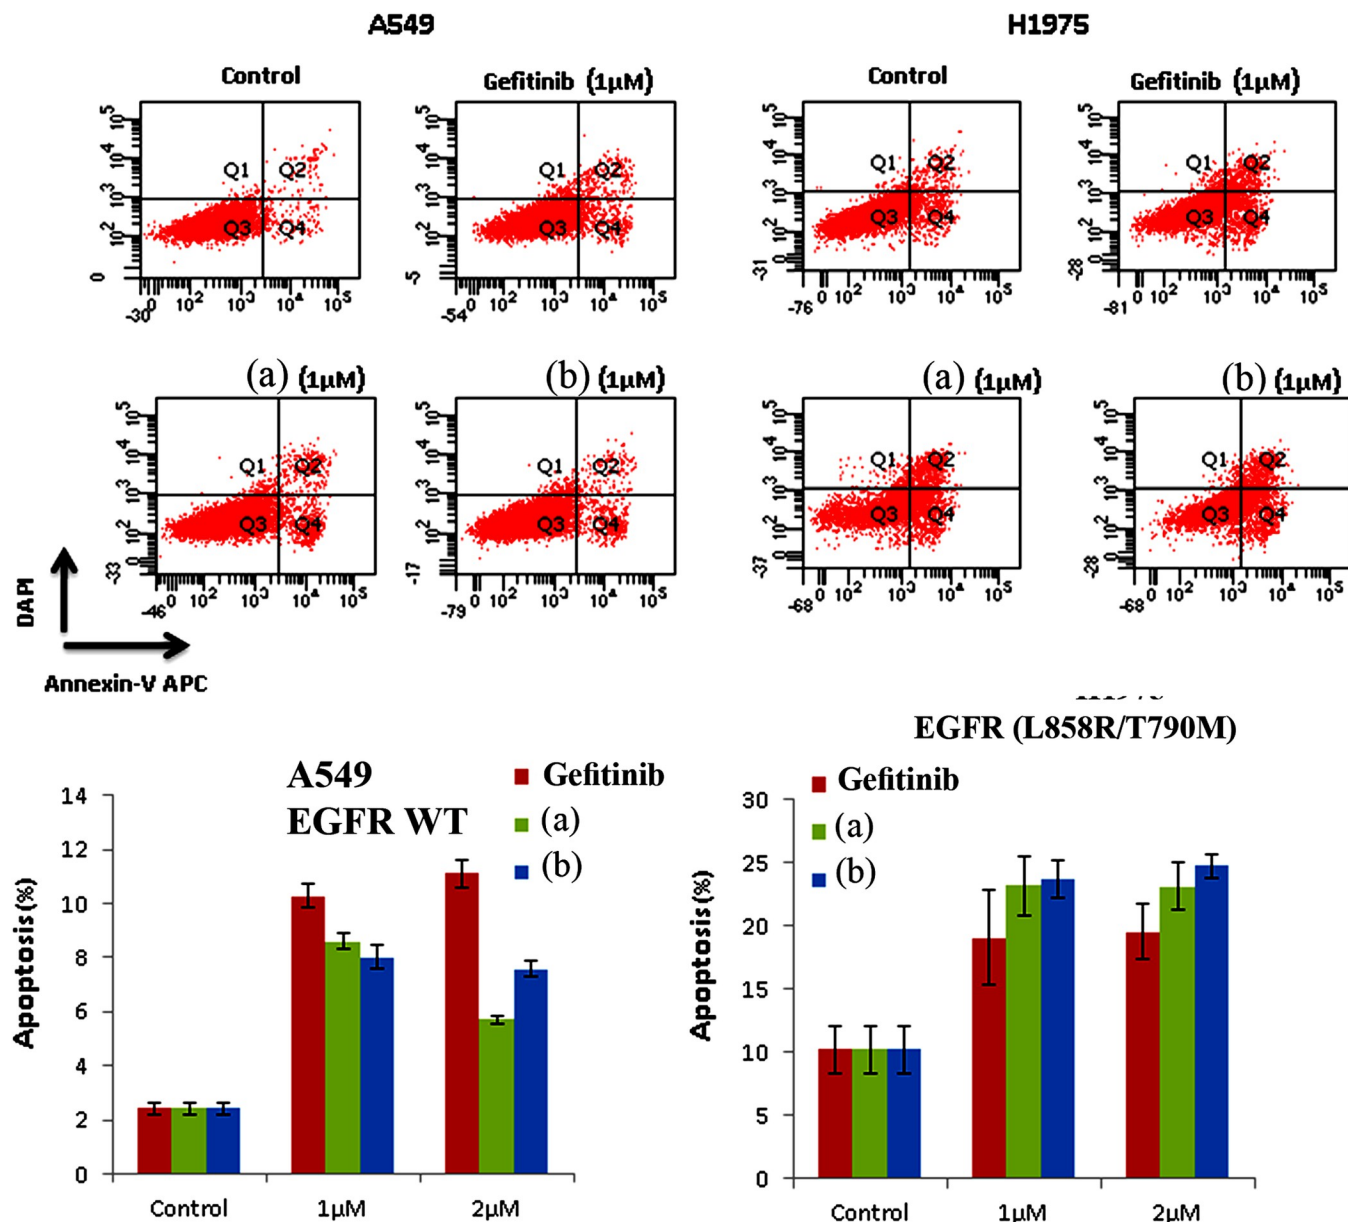

**Fig 11.** Selective apoptosis induction effect of compounds on H1975 cells harboring the EGFR L858R/T790M double mutation vs A549 cells that harboring wild-type EGFR compared with EGFR inhibitor reference drug gefitinib. The percentage of cells that underwent apoptosis was then analyzed on LSRII Flow Cytometer. The values represent mean  $\pm$  SEM (n = 3) \*; p < 0.05 compared to control by Student's t-test. Compounds are ZINC21802765 (a), ZINC21802749 (b).

<https://doi.org/10.1371/journal.pone.0298326.g011>

## Conclusions

In conclusion, the study utilized a ChemDiv dataset to identify drug-like compounds for EGFR-TK inhibition. Through various computational methods, four hit compounds were identified and their interactions with EGFR-TK were analyzed. The most active compounds showed strong inhibition of EGFR and selective effects on mutant cells, suggesting their potential as therapeutic agents for lung cancer. We anticipate that our current research into novel and specific EGFR-TKIs using the ChemDiv database will be helpful in identifying new compounds with therapeutic potential against lung cancer.

## Supporting information

**S1 File. Results of the virtual screening using LigandScout program.**  
(XLS)

**S2 File. Results of the virtual screening using Autodock Vina and Autodock 4.2 programs.**  
(XLSX)

## Author Contributions

**Conceptualization:** Awwad A. Radwan, Abdullah Al-Dhfyhan.

**Data curation:** Fars Alanazi.

**Funding acquisition:** Awwad A. Radwan.

**Methodology:** Awwad A. Radwan, Abdullah Al-Dhfyhan.

**Project administration:** Awwad A. Radwan.

**Resources:** Fars Alanazi.

**Software:** Awwad A. Radwan.

**Visualization:** Fars Alanazi.

**Writing – original draft:** Awwad A. Radwan, Abdullah Al-Dhfyhan.

**Writing – review & editing:** Awwad A. Radwan.

## References

1. Appert-Collin A, Hubert P, Crémel G, Bennasroune A. Role of ErbB receptors in cancer cell migration and invasion. *Front Pharmacol* 2015; 6(283):1–10. <https://doi.org/10.3389/fphar.2015.00283> PMID: 26635612
2. Roskoski R Jr. The ErbB/HER family of protein-tyrosine kinases and cancer. *Pharmacol Res* 2014; 79: 34–74. <https://doi.org/10.1016/j.phrs.2013.11.002> Epub 2013 Nov 20. PMID: 24269963
3. Jr RR. The ErbB/HER receptor protein-tyrosine kinases and cancer. *Cancer Biochem Biophys Res Commun* 2004; 319:1–11. <https://doi.org/10.1016/j.bbrc.2004.04.150> PMID: 15158434
4. Purba ER, Saita EI, Maruyama IN. Activation of the EGF receptor by ligand binding and oncogenic mutations: The "Rotation model". *Cells* 2017; 6(13):1–19. <https://doi.org/10.3390/cells6020013> PMID: 28574446
5. Chan BA, Hughes BGM. Targeted therapy for non-small cell lung cancer: current standards and the promise of the future. *Transl Lung Cancer Res* 2015; 4:36–54. <https://doi.org/10.3978/j.issn.2218-6751.2014.05.01> PMID: 25806345
6. Meng Y, Bai R, Cui J. Precision targeted therapy for EGFR mutation-positive NSCLC: Dilemmas and coping strategies. *Thorac Cancer* 2023; 14:1121–1134. <https://doi.org/10.1111/1759-7714.14858> Epub 2023 Apr 2. PMID: 37005552
7. Cai WQ, Zeng LS, Wang LF, Wang YY, Cheng JT, Zhang Y, et al. The latest battles between EGFR monoclonal antibodies and resistant tumor cells. *Front Oncol* 2020; 10(1249):1–16. <https://doi.org/10.3389/fonc.2020.01249> PMID: 32793499
8. Arnold AE, Malek-Adamian E, Le PU, Meng A, Martínez-Montero S, Petrecca K, et al. Antibody-anti-sense oligonucleotide conjugate downregulates a key gene in glioblastoma stem cells. *Mol Ther Nucleic Acids*. 2018; 11:518–527. <https://doi.org/10.1016/j.omtn.2018.04.004> Epub 2018 Apr 19. PMID: 29858087
9. Kaniowski D, Suwara J, Ebenryter-Olbińska K, Jakóbiak-Kolon A, Nawrot B. EGFR-targeted cellular delivery of therapeutic nucleic acids mediated by boron clusters. *Int J Mol Sci*. 2022; 23:14793. <https://doi.org/10.3390/ijms232314793> PMID: 36499115
10. Martinez-Marti A, Navarro A, Felip E. Epidermal growth factor receptor first generation tyrosine-kinase inhibitors. *Transl Lung Cancer Res* 2019; 3:S235–S246. <https://doi.org/10.21037/tlcr.2019.04.20> PMID: 31857948

11. Choowongkamon K, Sawatdichaikul O, Songtawee N, Limtrakul J. Receptor-based virtual screening of EGFR Kinase Inhibitors from the NCI Diversity Database. *Molecules* 2010; 15:4041–4054. <https://doi.org/10.3390/molecules15064041> PMID: 20657425
12. Șandor A, Ionuț I, Marc G, Oniga I, Eniu D, Oniga O. Structure-activity relationship studies based on quinazoline derivatives as EGFR kinase inhibitors (2017–Present). *Pharmaceuticals (Basel)* 2023; 16:534. <https://doi.org/10.3390/ph16040534> PMID: 37111291
13. Mansour MA, AboulMagd AM, Abbas SH, Abdel-Rahman HM, Abdel-Aziz M. Insights into fourth generation selective inhibitors of (C797S) EGFR mutation combating non-small cell lung cancer resistance: a critical review. *RSC Adv* 2023; 13:18825–18853. <https://doi.org/10.1039/d3ra02347h> PMID: 37350862
14. Weng CW, Wei CH, Tsai JY, Lai YH, Chang GC, Chen JJW. Hybrid pharmacophore- and structure-based virtual screening pipeline to identify novel EGFR inhibitors that suppress non-small cell lung cancer cell growth. *Int J Mol Sci* 2022; 23:3487. <https://doi.org/10.3390/ijms23073487> PMID: 35408854
15. Ciaffaglione V, Consoli V, Intagliata S, Marrazzo A, Romeo G, Pittalà V, et al. Novel tyrosine kinase inhibitors to target chronic myeloid leukemia. *Molecules (Basel, Switzerland)* 2022; 27:3220. <https://doi.org/10.3390/molecules27103220> PMID: 35630697
16. Sayalee C, Rajkumar HM, Sarwar A, Nikhil V, Radhacharan D, Veena D. Designing of CHK1 inhibitors by 3D-QSAR, virtual screening and induced fit docking studies. *Curr Sci Assoc* 2015; 109:2271–2277. <https://doi.org/10.18520/v109/i12/2271-2277>
17. Burkhard P., Taylor P., Walkinshaw M. D. X-ray structures of small ligand-FKBP complexes provide an estimate for hydrophobic interaction energies. *J. Mol. Biol.* 2000, 295, 953–962. <https://doi.org/10.1006/jmbi.1999.3411> PMID: 10656803
18. Hou X, Rooklin D, Yang D, Liang X, Li K, Lu J, et al. Computational strategy for bound state structure prediction in structure-based virtual screening: A case study of protein tyrosine phosphatase receptor type O inhibitors. *J chem Inf Model* 2018; 58:2331–2342. <https://doi.org/10.1021/acs.jcim.8b00548> PMID: 30299094
19. Yadav TT, Moin SG, Kumar MS, Chintamaneni M, YC M. A review on fused pyrimidine systems as EGFR inhibitors and their structure–activity relationship. *Front Chem* 2022; 10:861288. <https://doi.org/10.3389/fchem.2022.861288> PMID: 35769445
20. Yosaatmadja Y, Squire CJ. 1.85 Angstrom Structure of EGFR Kinase Domain with Gefitinib. Available online: <https://www.rcsb.org/structure/4WKQ> (accessed on 22 December 2022)
21. Ghose AK, Viswanadhan VN, Wendoloski JJ. A knowledge-based approach in designing combinatorial or medicinal chemistry libraries for drug discovery. 1. A qualitative and quantitative characterization of known drug databases. *J Comb Chem* 1999; 1:55–68. <https://doi.org/10.1021/cc9800071> PMID: 10746014
22. Wolber G, Langer T. LigandScout: 3-D pharmacophores derived from protein-bound ligands and their use as virtual screening filters. *J Chem Inf Model* 2005; 45:160–169. <https://doi.org/10.1021/ci049885e> PMID: 15667141
23. Houston DR, Walkinshaw MD. Consensus docking: Improving the reliability of docking in a virtual screening context. *J Chem Inf Model* 2013; 53:384–390. <https://doi.org/10.1021/ci300399w> Epub 2013 Feb 7. PMID: 23351099
24. Eberhardt J, Santos-Martins D, Tillack AF, Forli S. AutoDock Vina 1.2.0: New docking methods, expanded force field, and python bindings. *J chem Inf Model* 2021; 61:3891–3898. <https://doi.org/10.1021/acs.jcim.1c00203> Epub 2021 Jul 19. PMID: 34278794
25. Morris GM, Huey R, Lindstrom W, Sanner MF, Belew RK, Goodsell DS, et al. AutoDock4 and AutoDockTools4: Automated docking with selective receptor flexibility. *J Comp Chem* 2009; 30:2785–2791. <https://doi.org/10.1002/jcc.21256> PMID: 19399780
26. Schrödinger L, DeLano W. PyMOL [Internet]. 2020. Available from: <http://www.pymol.org/pymol>
27. Case DA, Ben-Shalom IY, Brozell SR, Cerutti DS, Cheatham TE III, Cruzeiro VWD, et al. Amber22, University of California, San Francisco, 2022.
28. Gohlke H, Case DA. Converging free energy estimates: MM-PB(GB)SA studies on the protein–protein complex Ras–Raf. *J Comput Chem* 2004; 25:238–250. <https://doi.org/10.1002/jcc.10379> PMID: 14648622
29. Bean J, Riely GJ, Balak M, Marks JL, Ladanyi M, Miller VA, et al. Acquired resistance to epidermal growth factor receptor kinase inhibitors associated with a novel T854A mutation in a patient with EGFR-mutant lung adenocarcinoma. *Clin Cancer Res* 2008; 14: 7519–7525. <https://doi.org/10.1158/1078-0432.CCR-08-0151> PMID: 19010870
30. Chiba M, Togashi Y, Bannno E, Nakamura Y, Hayashi H, Terashima M, et al. Efficacy of irreversible EGFR-TKIs for the uncommon secondary resistant EGFR mutations L747S, D761Y, and T854A. *BMC Cancer* 2017; 17:281–291. <https://doi.org/10.1186/s12885-017-3263-z> PMID: 28424065

31. Hanan EJ, Eigenbrot C, Bryan MC, Burdick DJ, Chan BK, Chen Y, et al. Discovery of selective and non-covalent diaminopyrimidine-based inhibitors of epidermal growth factor receptor containing the T790M resistance mutation. *J Med Chem*. 2014; 57:10176–10191. <https://doi.org/10.1021/jm501578n> PMID: 25383627
32. Roe DR, Cheatham TE III. PTRAJ and CPPTRAJ: Software for processing and analysis of molecular dynamics trajectory data. *J Chem Theory Comput* 2013; 9:3084–3095. <https://doi.org/10.1021/ct400341p> PMID: 26583988
33. Bello M, Saldaña-Rivero L, Correa-Basurto J, García B, Sánchez-Espinosa VA. Structural and energetic basis for the molecular recognition of dual synthetic vs. natural inhibitors of EGFR/HER2. *Int J Biol Macromol* 2018; 111:569–586. <https://doi.org/10.1016/j.ijbiomac.2017.12.162> Epub 2018 Jan 9. PMID: 29329808
34. Kou S-B, Lin Z-Y, Wang B-L, Shi J-H, Liu Y-X. Evaluation of the binding behavior of olmutinib (HM61713) with model transport protein: Insights from spectroscopic and molecular docking studies. *J Mol Struct* 2021; 1224:129024. <https://doi.org/10.1016/j.molstruc.2020.129024>
35. Radwan A, Alanazi F. Combined modeling study of the binding characteristics of natural compounds, derived from Psoralea Fruits, to  $\beta$ -amyloid peptide monomer. *Int J Mol Sci* 2022; 23:3546. <https://doi.org/10.3390/ijms23073546> PMID: 35408917;
36. Radwan A, Mahrous GM. Docking studies and molecular dynamics simulations of the binding characteristics of waldiomycin and its methyl ester analog to *Staphylococcus aureus* histidine kinase. *PLoS One* 2020; 15:e0234215. <https://doi.org/10.1371/journal.pone.0234215> PMID: 32502195
37. Shama SV, Bell DW, Settleman J, Haber DA. Epidermal growth factor receptor mutation in lung cancer. *Nat Rev Cancer*. 2007; 7:169–181. <https://doi.org/10.1038/nrc2088> PMID: 17318210
38. Pao W, Chmielecki J. Rational biologically based treatment of EGFR-mutation non-small-cell lung cancer. *Nat Rev Cancer*. 2010; 10:760–774. <https://doi.org/10.1038/nrc2947> PMID: 20966921
39. Catado VD, Gibbons DL, Pérez-Solar R, Quintás-Cardama A. Treatment of non-small-cell lung cancer with erlotinib or gefitinib. *N Engl J Med*. 2011; 64:947–955. <https://doi.org/10.1056/NEJMct0807960> PMID: 21388312
40. Stella GM, Luisetti M, Inghilleri S, Cemmi F, Scabini R, Zorzetto M, et al. Targeting EGFR in non-small-cell lung cancer: lessons experiences, strategies. *Respir Med*. 2012; 106:173–183. <https://doi.org/10.1016/j.rmed.2011.10.015> PMID: 22104541
41. Kobayashi S, Boggon TJ, Dayaram T, Jänne DA, Kocher O, Meyerson M, et al. EGFR mutation and resistance of non-small-cell lung cancer to gefitinib. *N Engl J Med*. 2005; 352:786–792. <https://doi.org/10.1056/NEJMoa044238> PMID: 15728811
42. Pao W, Miller VA, Politi KA, Ricly GJ, Somwar R, Zakowski MF, et al. Acquired resistance of lung adenocarcinoma to gefitinib or erlotinib is associated with a second mutation in the EGFR kinase domain. *PLoS Med*. 2005; 2:e73. <https://doi.org/10.1371/journal.pmed.0020073> PMID: 15737014
